# Supplementary material for: Cu/Cu2O/rGO nanocomposites: solid-state self-reduction synthesis and catalytic activity for p-nitrophenol reduction
Source: Royal Society of Chemistry journal article supplement (doi:10.1039/c9nj02768h), 2019-01-01
Supplement: c9nj02768h1.pdf [file c9nj02768h1.pdf]

## Supplemental Information

### Cu/Cu<sub>2</sub>O/rGO Nanocomposites: Solid-state Self-reduction Synthesis and Catalytic Activity for *p*-Nitrophenol Reduction

Yuehong Xie<sup>a,b</sup>, Baolin Liu<sup>a</sup>, Yizhao Li<sup>a,b,\*</sup>, Zixi Chen<sup>a</sup>, Yali Cao<sup>a,\*</sup>, Dianzeng Jia<sup>a</sup>

<sup>a</sup> Key Laboratory of Energy Materials Chemistry, Ministry of Education, Key Laboratory of Advanced Functional Materials, Autonomous Region, Institute of Applied Chemistry, Xinjiang University, Urumqi, Xinjiang 830046, China

<sup>b</sup> College of Chemistry and Chemical Engineering, Xinjiang University, Urumqi, Xinjiang 830046, China

\*Corresponding author. Tel.: +86 991 8583083; fax: +86 991 8580032.

E-mail address: liyizhao0809@126.com (Y. Li), caoyali@xju.edu.cn (Y. Cao)

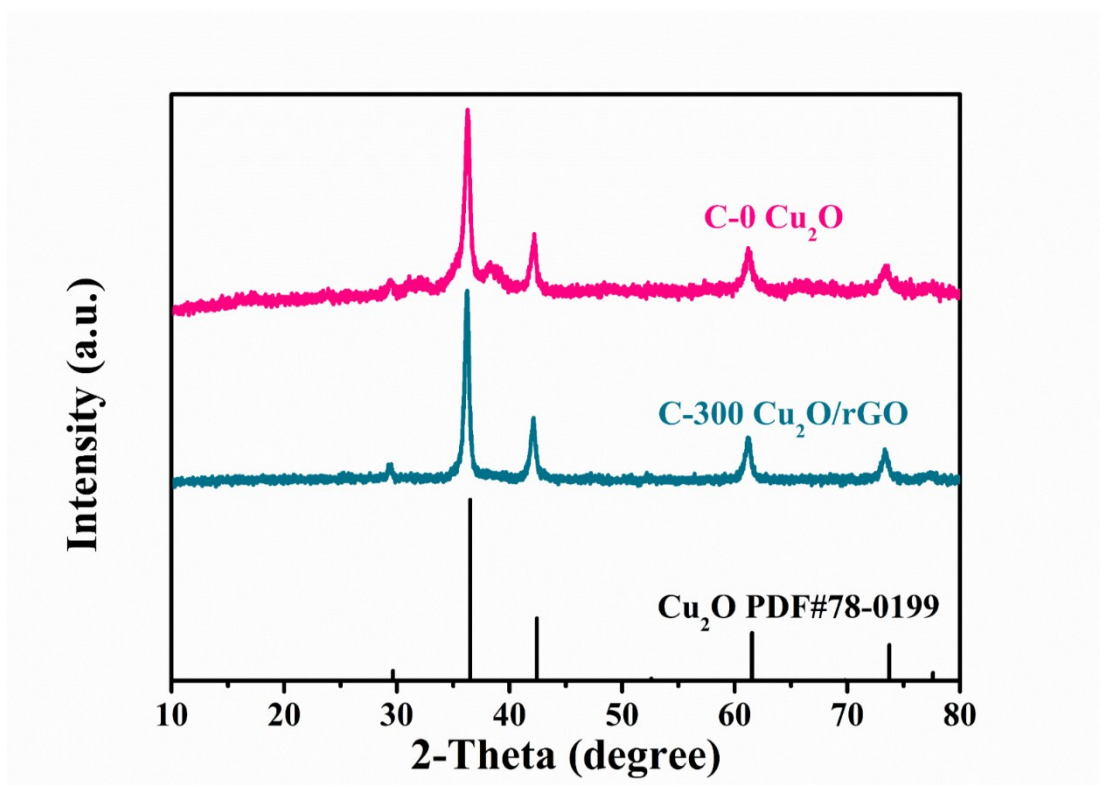

Figure S1 The XRD pattern of the sample C-0 and C-300.

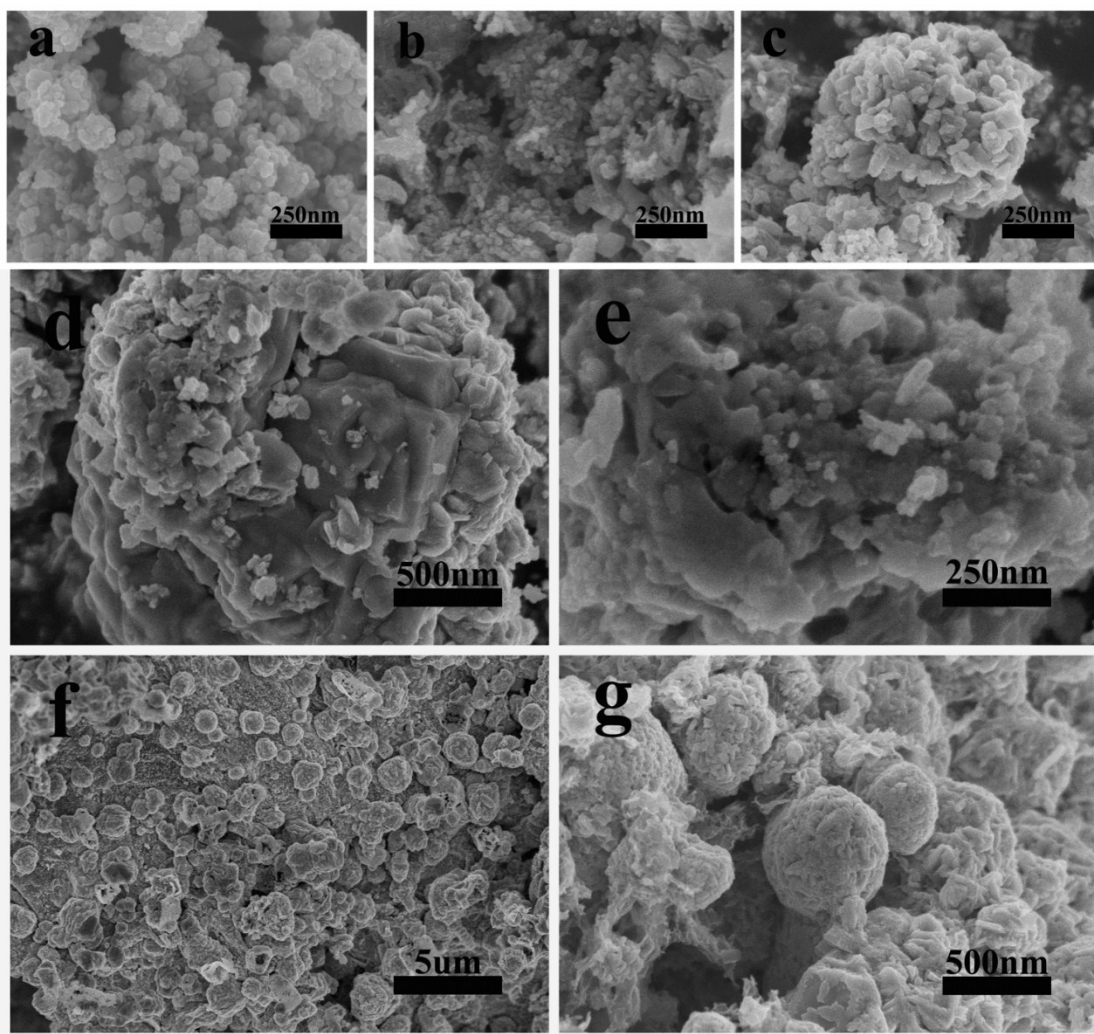

**Figure S2** SEM images of the samples: (a) C-0  $\text{Cu}_2\text{O}$ ; (b) C-25  $\text{Cu}_2\text{O}/\text{CuO}/\text{rGO}$ ; (c) C-300  $\text{Cu}_2\text{O}/\text{rGO}$ ; (d, e) C-400  $\text{Cu}/\text{Cu}_2\text{O}/\text{rGO}$  with different magnification; (f, g) C-500  $\text{Cu}/\text{Cu}_2\text{O}/\text{rGO}$  with different magnification.

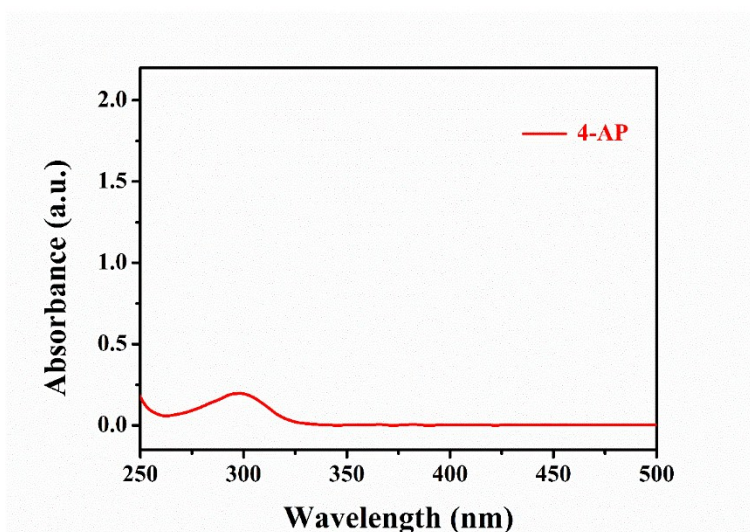

**Figure S3** UV-vis spectra of the pure 4-AP solution (0.1 mM).

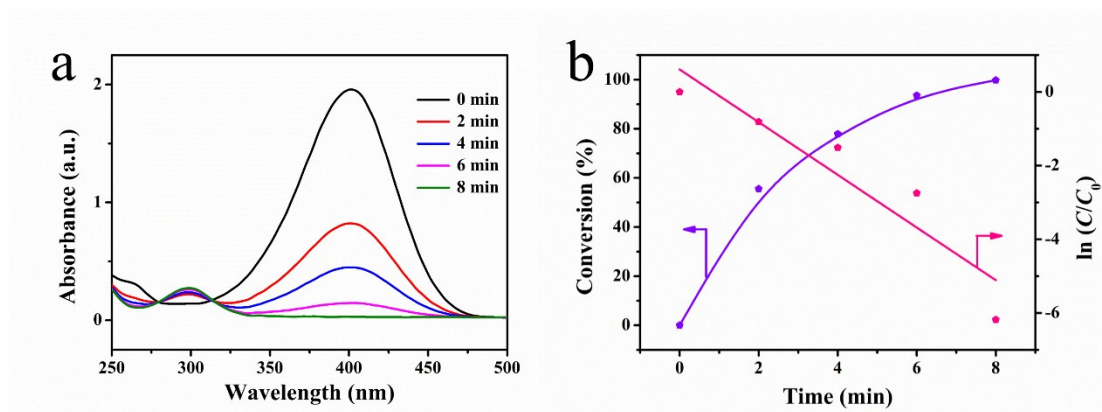

**Figure S4** (a) UV-vis spectra of the 4-NP reduction reaction on Cu<sub>2</sub>O (C-0) catalysts at different time. (b) Conversion rate of 4-NP over Cu<sub>2</sub>O (C-0) as a function of time (min, left); the relationship between  $\ln(C/C_0)$  and reaction time (min) for Cu<sub>2</sub>O (C-0, right).

**Table S1** Summary of catalytic activities for the reduction of 4-NP with various catalysts.

| Catalysts                             | 4-NP,<br>(10 <sup>-3</sup> mmol) | Catalyst<br>usage (mg) | Time   | k <sub>app</sub><br>(10 <sup>-3</sup> s <sup>-1</sup> ) | M <sup>a</sup><br>(10 <sup>-3</sup> mol g <sup>-1</sup> h <sup>-1</sup> ) | E <sub>a</sub> .<br>(kJ mol <sup>-1</sup> ) | Refs.            |
|---------------------------------------|----------------------------------|------------------------|--------|---------------------------------------------------------|---------------------------------------------------------------------------|---------------------------------------------|------------------|
| Cu <sub>2</sub> O/rGO                 | 50                               | 2                      | 8 min  | 7.0                                                     | 115                                                                       | -                                           | This work        |
| Cu/Cu <sub>2</sub> O/rGO              | 50                               | 2                      | 6 min  | 16.3                                                    | 250                                                                       | 24.94                                       | This work        |
| Pd@hTiO <sub>2</sub>                  | 0.184                            | 0.025                  | 16 min | 4.5                                                     | 6                                                                         | -                                           | 1 <sup>1</sup>   |
| CuO-MnO <sub>2</sub>                  | 0.3                              | 1                      | 14 min | 4.4                                                     | 1                                                                         | -                                           | 2 <sup>2</sup>   |
| CuFe <sub>2</sub> O <sub>4</sub>      | 0.5                              | 0.04                   | 10 min | 120                                                     | 75                                                                        | -                                           | 3 <sup>3</sup>   |
| Cu <sub>2</sub> O on h-BN             | 7.2                              | 10                     | 12 min | 7.08                                                    | 0.5                                                                       | -                                           | 4 <sup>4</sup>   |
| CuO/ZnO                               | 62.5                             | 5                      | 180 s  | -                                                       | 0.25                                                                      | -                                           | 5 <sup>5</sup>   |
| Cu-LDH/rGO                            | 0.2                              | 0.025                  | 2 min  | 27.04                                                   | 240                                                                       | -                                           | 6 <sup>6</sup>   |
| NiO/CuO                               | 0.3                              | 0.05                   | 4 min  | 0.025                                                   | 36                                                                        | -                                           | 7 <sup>7</sup>   |
| Leaf-like CuO                         | 0.3                              | 0.03                   | 2 min  | 35.5                                                    | 120                                                                       | 33.56                                       | 8 <sup>8</sup>   |
| 1.0Au/MCN                             | 0.01919.33                       | 20                     | 18 min | 5.67                                                    | -                                                                         | -                                           | 9 <sup>9</sup>   |
| Fe <sub>3</sub> O <sub>4</sub> @TA/Ag | 3                                | 2                      | 60 s   | 43.6                                                    | -                                                                         | -                                           | 10 <sup>10</sup> |
| MgAl-LDH@Au                           | 0.3                              | 0.02                   | 260 s  | 13                                                      | -                                                                         | -                                           | 11 <sup>11</sup> |
| Cu-Pd/HSAG                            | 0.3                              | 1.5                    | 20 s   | 300                                                     | 1.8                                                                       | -                                           | 12 <sup>12</sup> |

<sup>a</sup> M is a specific rate per mass of catalyst basis.

## References

1. X. Zhou, X. Zhu, J. Huang, X. Li, P. Fu, L. Jiao, H. Huo and R. Li, *RSC Advances*, 2014, 4, 33055.
2. J. Pal, C. Mondal, A. K. Sasmal, M. Ganguly, Y. Negishi and T. Pal, *ACS Applied Materials & Interfaces*, 2014, 6, 9173-9184.
3. J. Feng, L. Su, Y. Ma, C. Ren, Q. Guo and X. Chen, *Chemical Engineering Journal*, 2013, 221, 16-24.
4. C. Huang, W. Ye, Q. Liu and X. Qiu, *ACS Appl Mater Interfaces*, 2014, 6, 14469-14476.
5. M. Bordbar, N. Negahdar and M. Nasrollahzadeh, *Separation and Purification Technology*, 2018, 191, 295-300.
6. L. Dou and H. Zhang, *Journal of Materials Chemistry A*, 2016, 4, 18990-19002.
7. G. Wu, X. Liang, L. Zhang, Z. Tang, M. Al-Mamun, H. Zhao and X. Su, *ACS Applied Materials & Interfaces*, 2017, 9, 18207-18214.
8. W. Che, Y. Ni, Y. Zhang and Y. Ma, *Journal of Physics and Chemistry of Solids*, 2015, 77, 1-7.
9. S. Chen, H. Fu, L. Zhang and Y. Wan, *Applied Catalysis B: Environmental*, 2019, 248, 22-30.
10. H. Veisi, S. Moradi, A. Saljooqi and P. Safarimehr, *Materials science & engineering. C, Materials for biological applications*, 2019, 100, 445-452.
11. K. Iqbal, A. Iqbal, A. Kirillov, B. Wang, W. Liu and Y. Tang, *Journal of Materials Chemistry A*, 2017, 5, 6716-6724.
12. M. Morales, M. Rocha, C. Freire, E. Asedegbega-Nieto, E. Gallegos-Suarez, I. Rodríguez-

Ramos and A. Guerrero-Ruiz, *Carbon*, 2017, 111, 150-161.
